# Supplementary material for: Hematopoietic stem and progenitor cells take the route through the bone marrow endothelium
Source: PubMed Central journal article supplement — Haematologica. 2020 Dec 1;105(12):2700–1. doi: 10.3324/haematol.2020.262113 (PMC7716267; doi:10.3324/haematol.2020.262113), 2020-12-01
Supplement: 2020_262113-Disclosures_Contributions.pdf [file 2020_262113-Disclosures_Contributions.pdf]

Haematologica  
HAEMATOL/2020/262113  
Version 1

HSPC take the route through the bone marrow endothelium

Lydia Kalafati and Triantafyllos Chavakis

Disclosures: None

Contributions: LK and TC wrote the manuscript
